# Supplementary material for: The putative Escherichia coli dehydrogenase YjhC metabolises two dehydrated forms of N-acetylneuraminate produced by some sialidases
Source: Biosci Rep. 2020 Jun 24;40(6):BSR20200927. doi: 10.1042/BSR20200927 (PMC7315737; doi:10.1042/BSR20200927)
Supplement: Supplementary Figures S1-S8 [file BSR-2020-0927_supp.pdf]

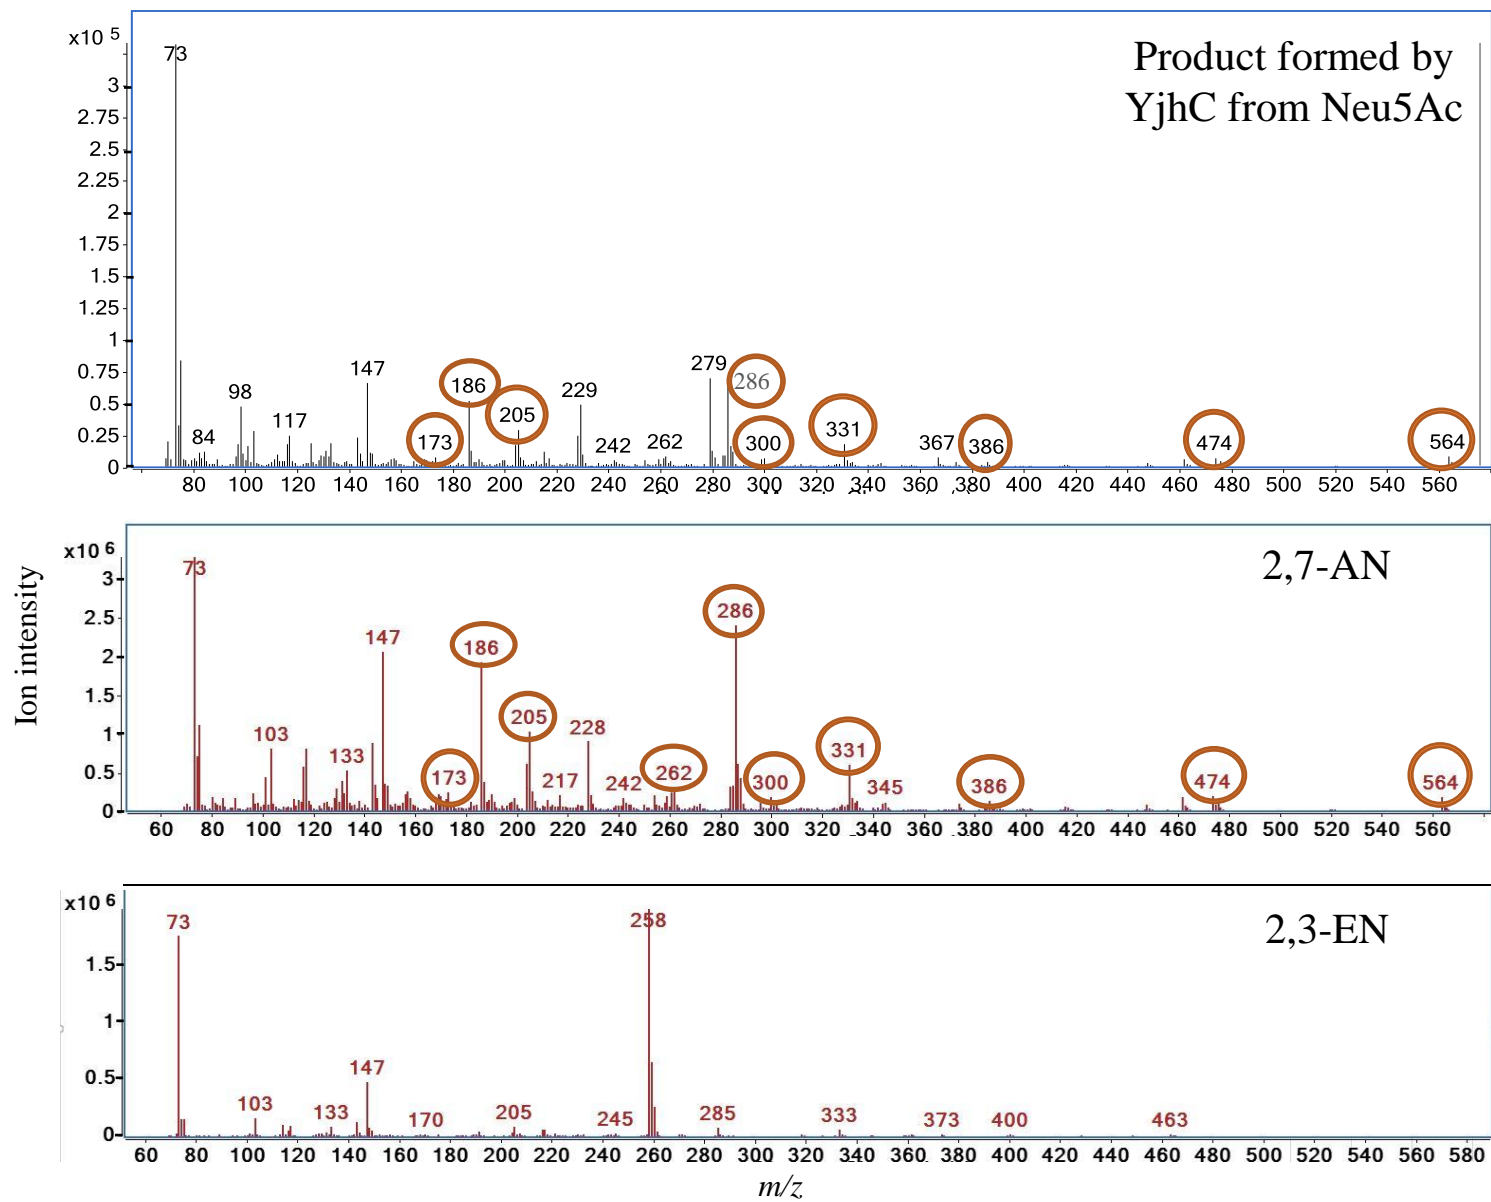

FIGURE S1

**Figure S1: GC-MS analysis of the dehydrated product formed from Neu5Ac by YjhC.** The spectrum of the TMS derivative of the product formed from Neu5Ac by YjhC is compared to those of the silyl derivatives of 2,7-AN and 2,3-EN obtained by analysis of 2,7-AN and 2,3-EN standards. The spectrum of the product shows that 10 peaks are in common with those of the 2,7-AN (in agreement with Suzuki *et al.*, 1984). This spectrum is different from the one of 2,3-EN.

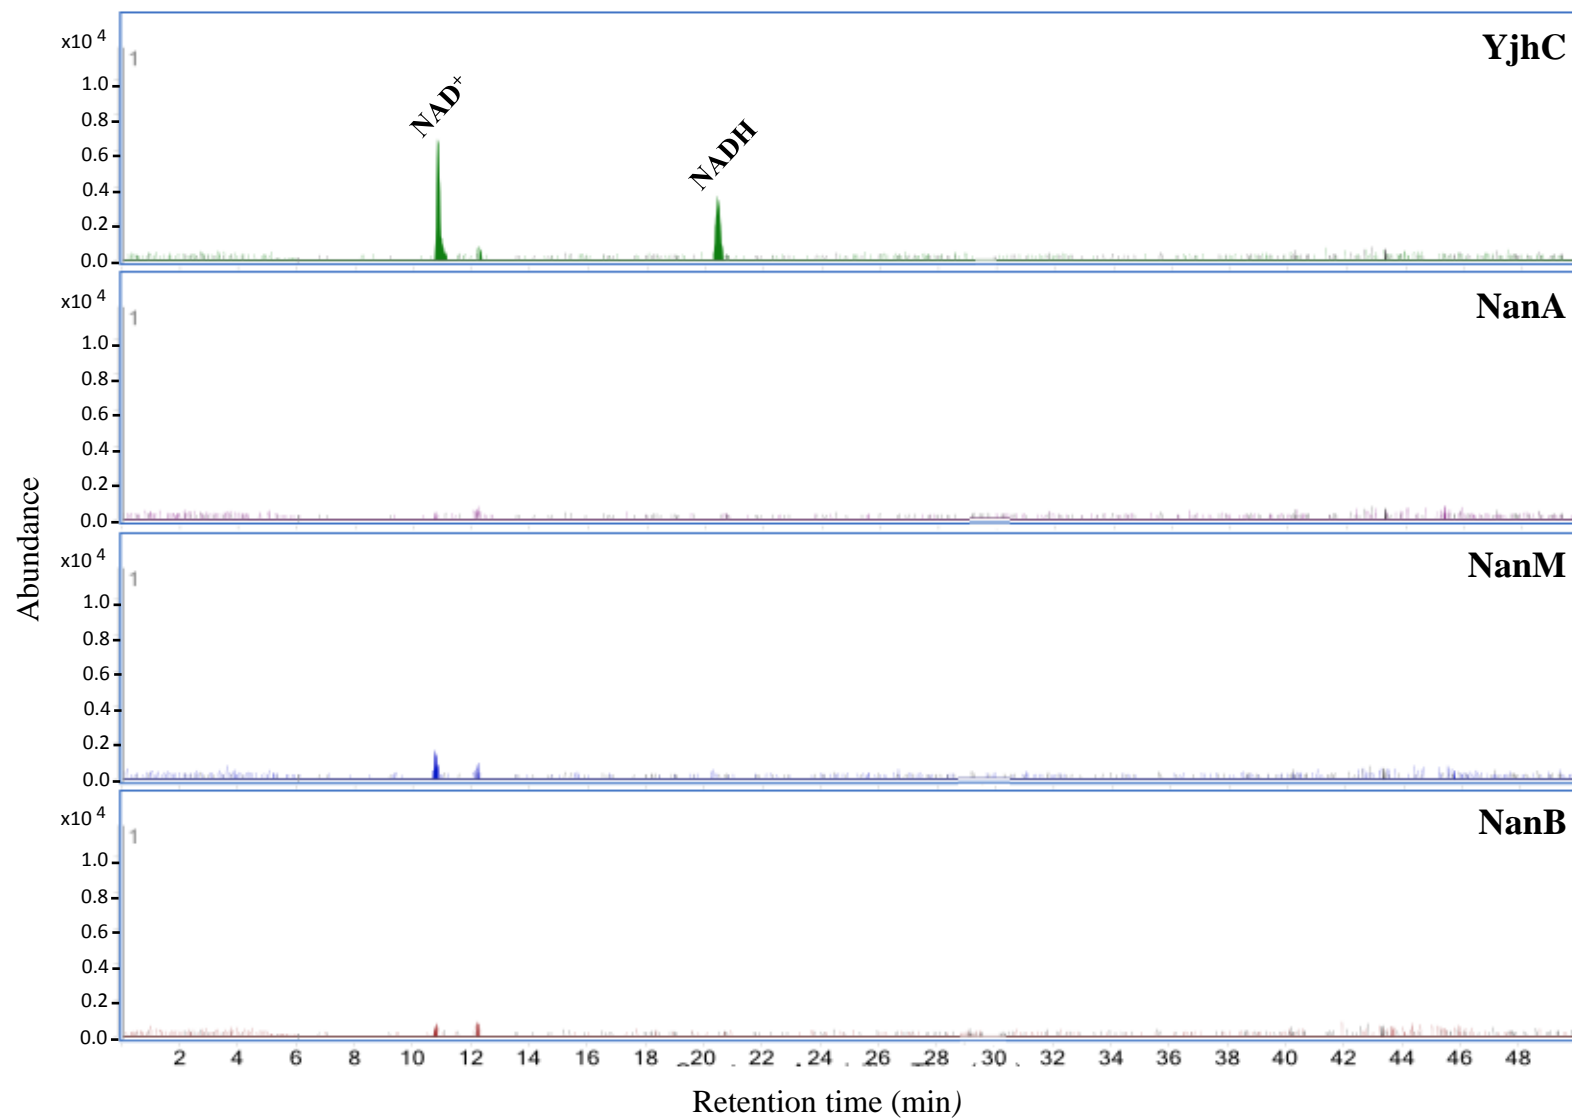

**FIGURE S2**

**Figure S2: Presence of NAD<sup>+</sup> and NADH in the preparation of purified YjhC.**

The figure shows extracted ion currents for NAD<sup>+</sup> ( $m/z$  662.1014) and NADH ( $m/z$  664.1180) in LC-MS chromatograms on which samples of denatured (purified) recombinant proteins. The following proteins were analysed: *E. coli* YjhC (1.5 nmol), NanA (1.5 nmol) and NanM (1.5 nmol), and *S. pneumoniae* sialidase B (0.8 nmol). The identity of the NAD<sup>+</sup> and NADH peaks was ascertained by the exact  $m/z$  value and by coelution with standards. From these data we calculated that the preparation of YjhC contained 0.094 mol NAD<sup>+</sup> and 0.008 mol NADH/mol of protein, respectively.

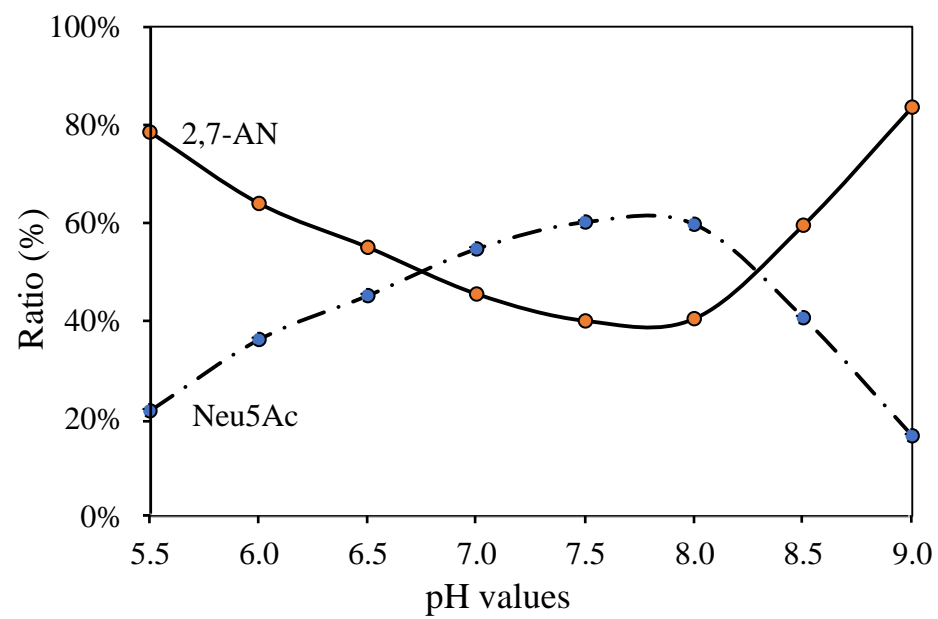

**FIGURE S3**

**Figure S3: Effect of pH on the 2,7-AN hydrolase activity of YjhC.**

The assay was performed in two steps (as in Fig. 3). The incubation mixture contained the following buffers (50 mM) : MES (pH-5.5-6.5), HEPES (pH 7-8), Tris (8.5-9), as well as 10 mM KCl, 1 mM DTT, 1 mM MgCl<sub>2</sub>, 50 mM NAD<sup>+</sup>, 0.5 mg/mL bovine serum albumin, 0.45 μM YjhC and 1 mM 2,7-AN. The assay was performed in a volume of 200 μL and at 37 °C. After 15 min incubation, the reactions were arrested by heating at 80 °C for 5 min. Concentrations of residual substrates and formed Neu5Ac were measured spectrophotometrically.

**A**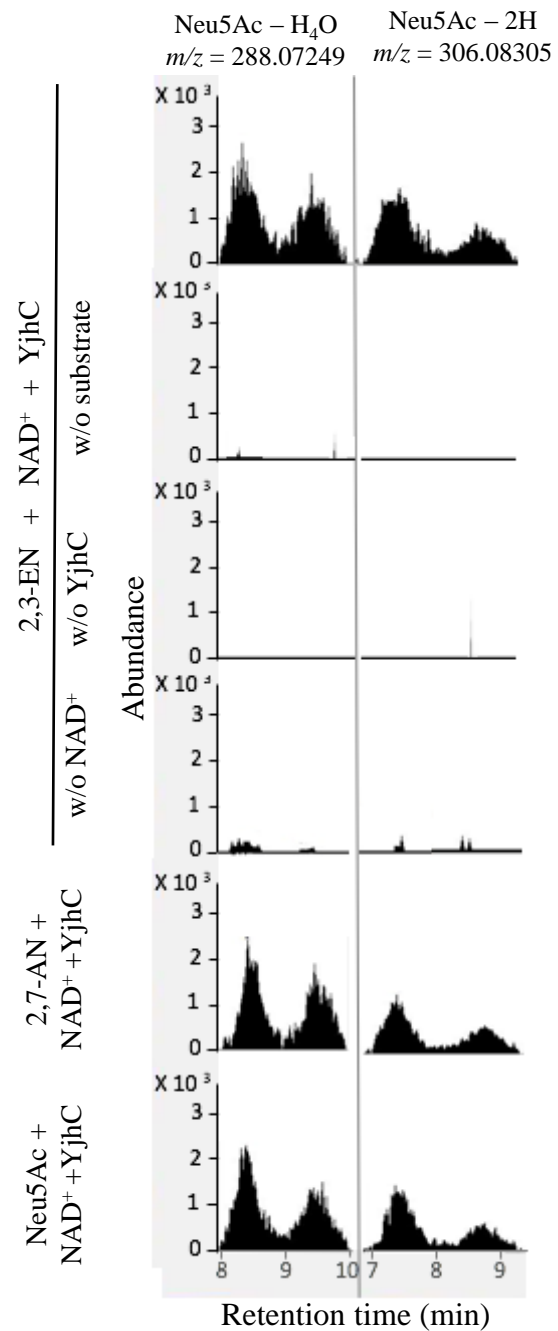**FIGURE S4**

**Figure S4: Formation of dehydro (-2H) and dehydro-anhydro(-H<sub>4</sub>O) derivatives of sialic acid in the presence of substrate and NAD<sup>+</sup>.** LC-MS analysis showing the appearance of peaks corresponding to putative intermediates in a reaction mixture containing, as indicated, 1 mM 2,3-EN, 2,7-AN or Neu5Ac, 0.45 μM YjhC and 30 μM NAD<sup>+</sup>.

2,3-EN

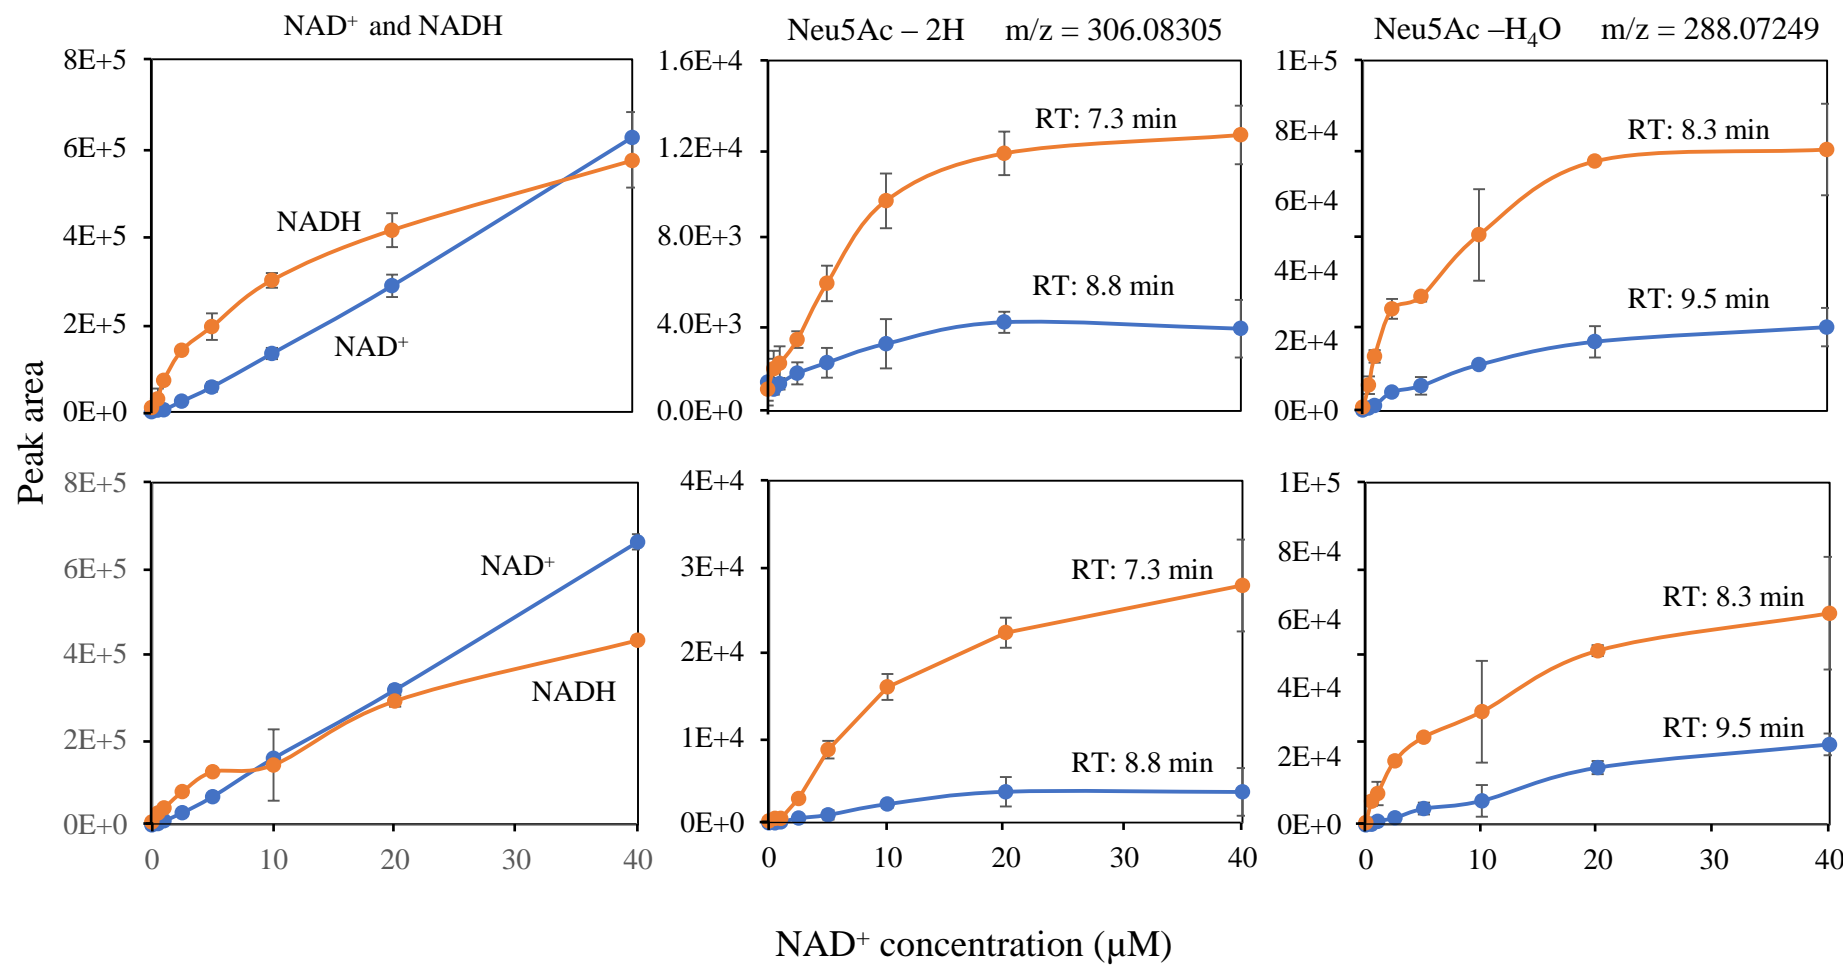

FIGURE S5

**Figure S5: Effect of  $\text{NAD}^+$  concentration on the formation of NADH and intermediates.**

Same experiment as in Fig. 4.

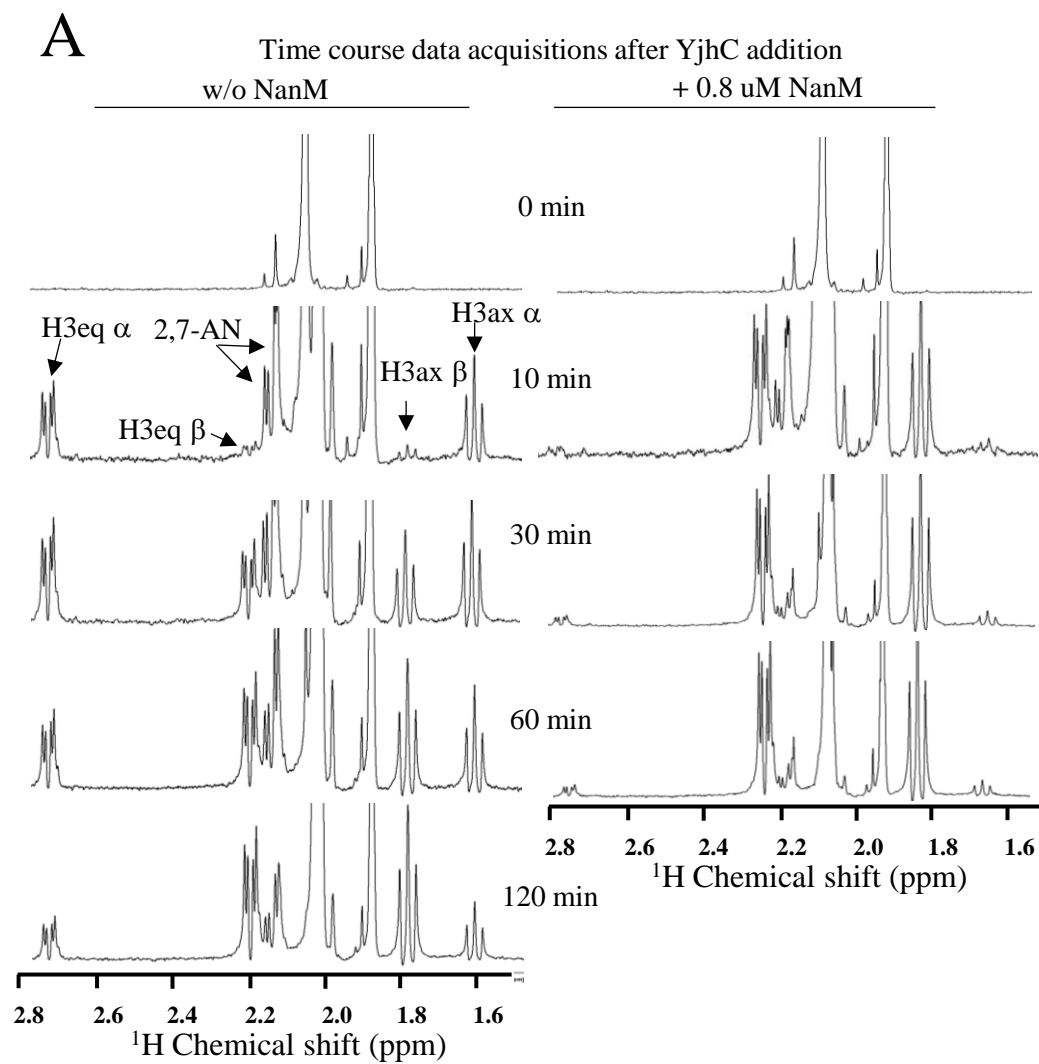

**FIGURE S6**

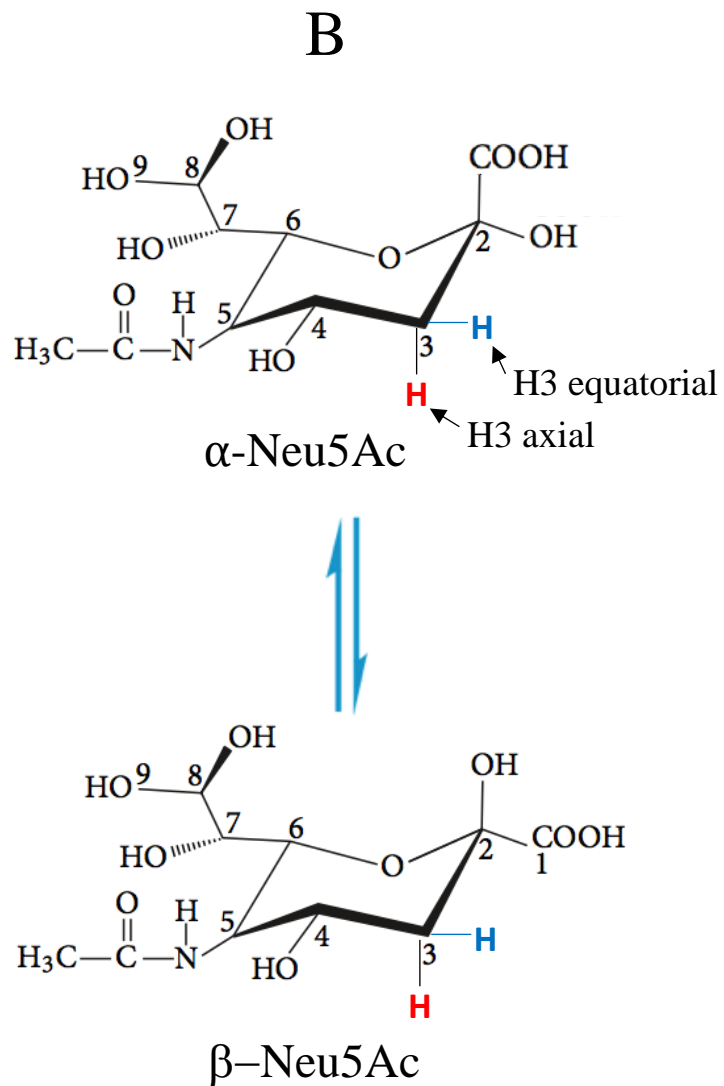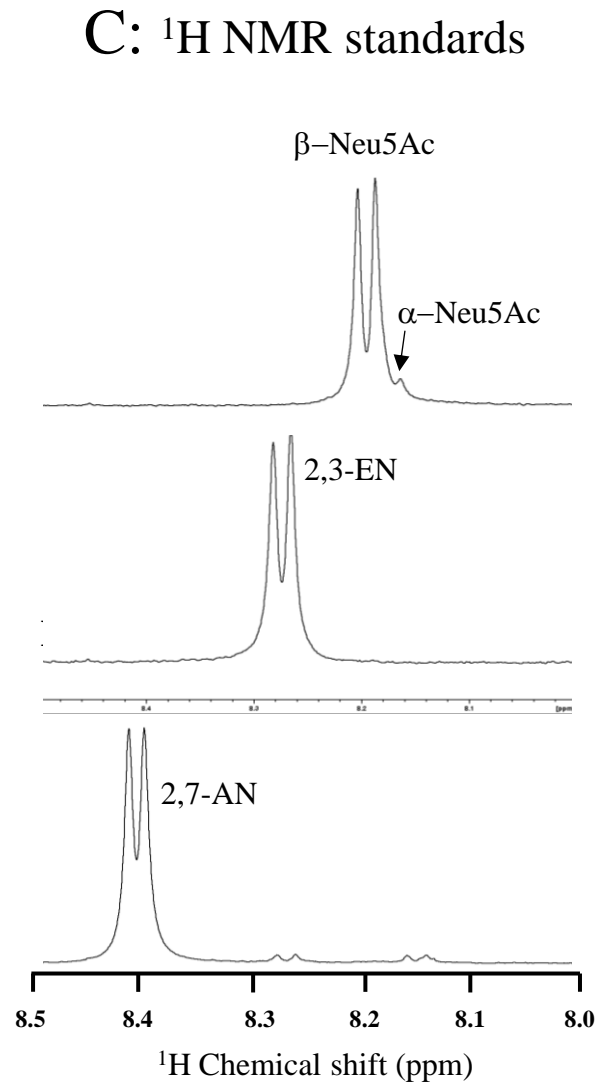

**FIGURE S6**

**Figure S6:NMR study of the reaction of YjhC with 2,3-EN.**

A: Same experiment as in Fig. 7. The figure shows the 1.6-2.8 ppm region for the indicated scans. The shifts corresponding to axial and equatorial H3 are indicated. B: Structure of the alpha and beta-anomer of Neu5Ac. C: NMR spectra of Neu5ac, 2,3-EN and 2,7-AN showing the 8 ppm region comprising the shifts of N5-H. These peaks were used to quantify the three compounds.

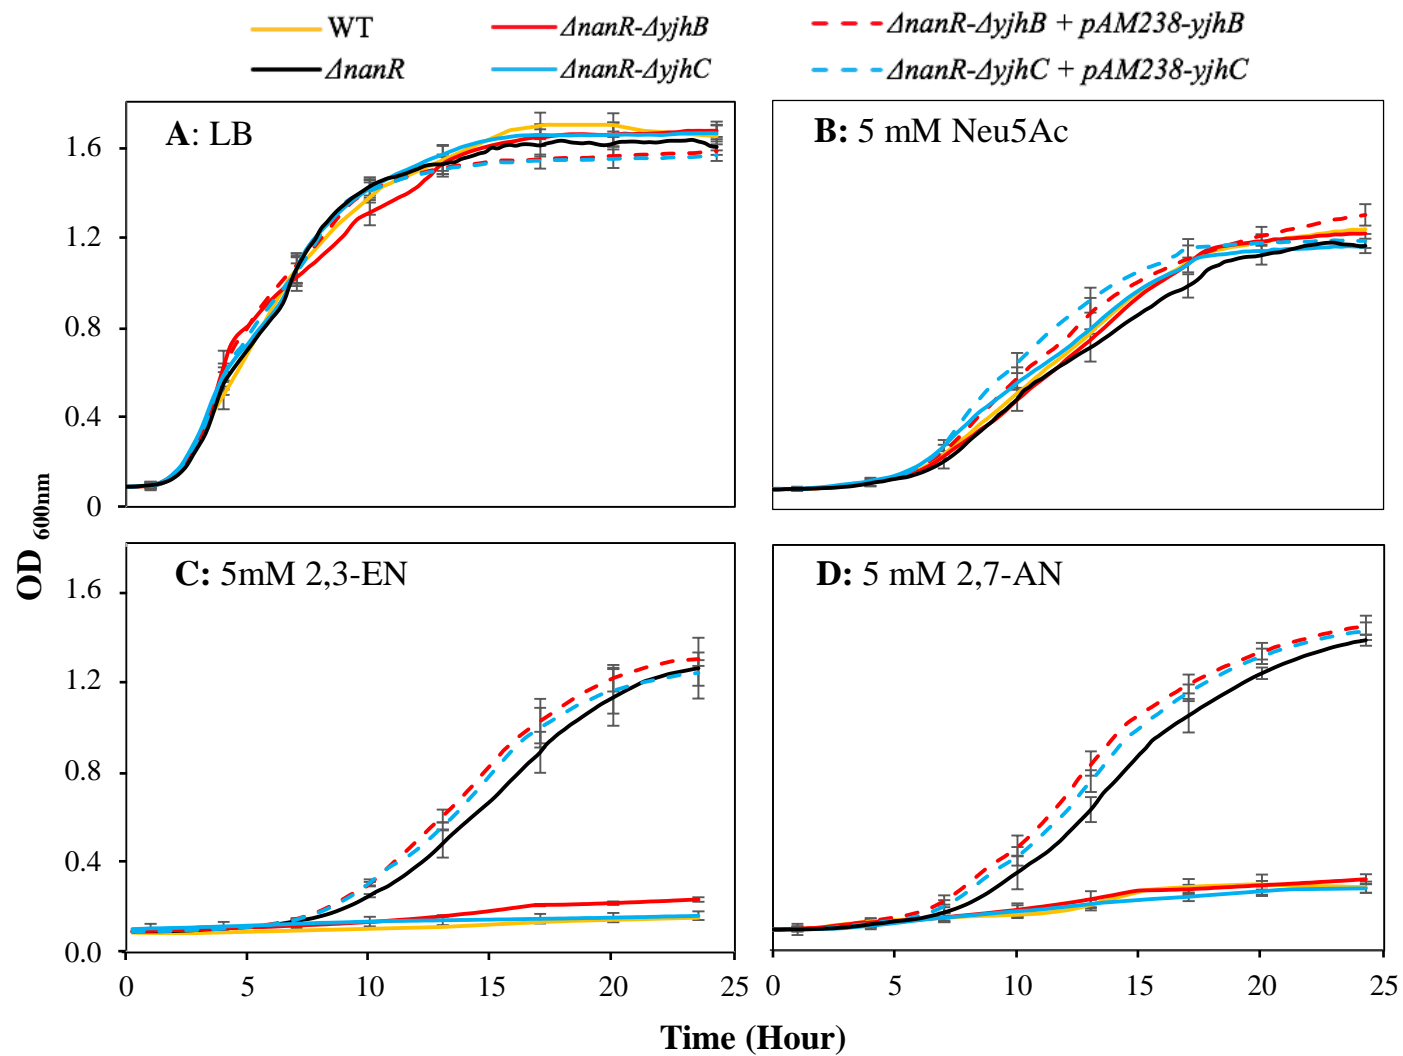

**FIGURE S7**

**Figure S7: Growth of *E. coli* on 2,3-EN or 2,7-AN depends on the inactivation of NanR and on functional YjhC and YjhB.**

Growth of WT,  $\Delta nanR$ ,  $\Delta nanR\text{-}\Delta yjhC$  and  $\Delta nanR\text{-}\Delta yjhB$  and YjhC or YjhB complemented strains on LB medium (A) or M9 medium containing 5 mM Neu5Ac (B), 2,3-EN (C) or 2,7-AN (D).
